# Supplementary material for: Fast approximate hierarchical clustering using similarity heuristics
Source: Springer Nature journal article supplement (doi:10.1186/1756-0381-1-9), 2008-09-22
Supplement: Additional file 1 [file 1756-0381-1-9-s1.pdf]

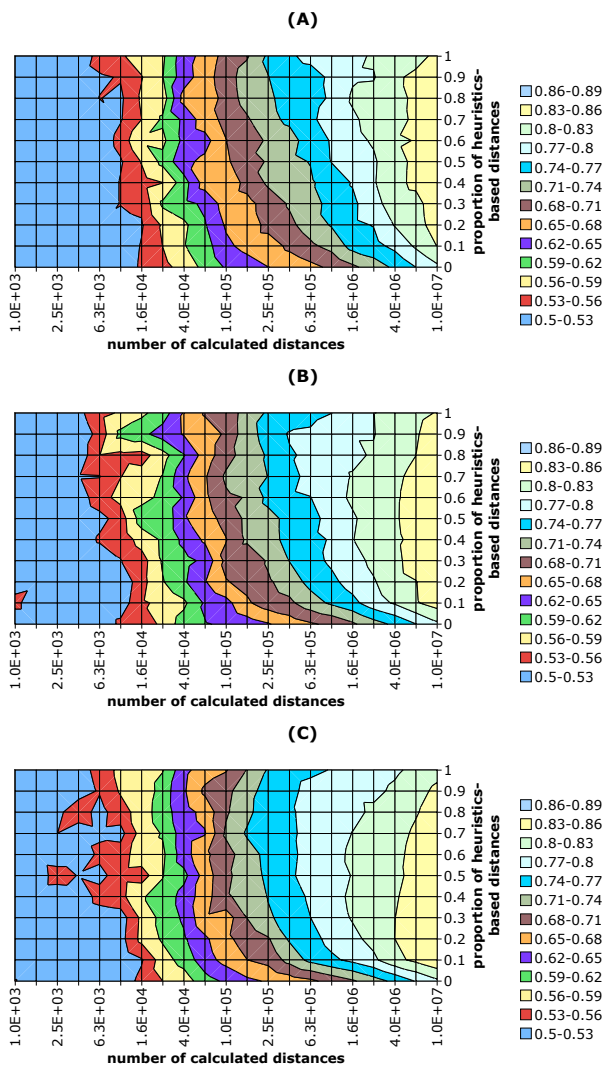

**Supplementary Fig. 1:** HappieClust JDR quality for data=Shyamsundar05 and different numbers of pivots: (A)  $q = 5$ ; (B)  $q = 10$ ; (C)  $q = 20$ .

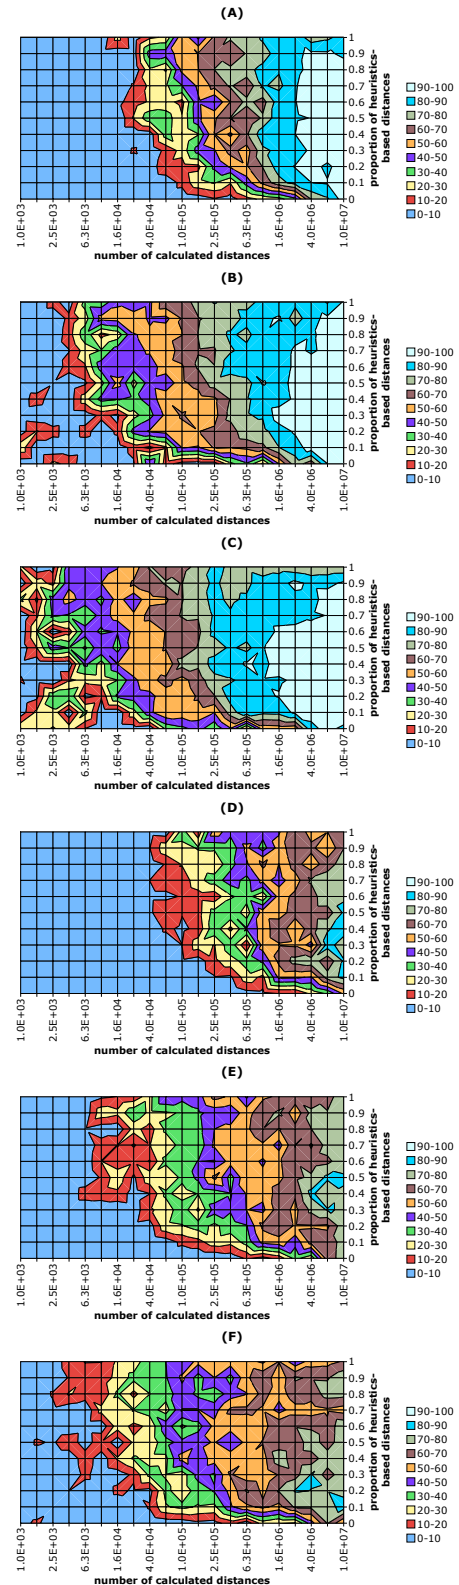

**Supplementary Fig. 2:** GO50 and GO25 quality of HappieClust for data=Shyamsundar05 and different numbers of pivots. (A)  $q = 5$ , GO50; (B)  $q = 10$ , GO50; (C)  $q = 20$ , GO50; (D)  $q = 5$ , GO25; (E)  $q = 10$ , GO25; (F)  $q = 20$ , GO25.
